# Supplementary material for: A Replicating Single-Cycle Adenovirus Vaccine Effective against Clostridium difficile
Source: MDPI journal article supplement (doi:10.3390/vaccines8030470), 2020-08-22
Supplement: s1 [file s1]

**A**  
***TcdA/B Receptor Binding Domain (RBD)  
Fusion Protein***

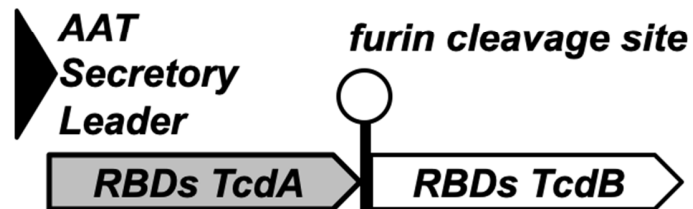

**B**  
***Single-cycle Ad6 (SC-Ad6) Vector***

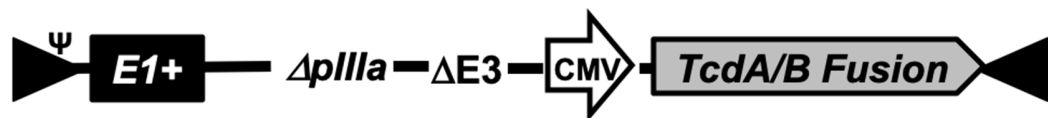

Supplemental Figure S1. Schematic of TcdA/B fusion protein and SC-Ad6 plasmids expressing fusion protein (A) TcdA/B fusion protein consists of a human *alpha* 1-antitrypsin (AAT) secretory leader sequence and the RBDs of TcdA and TcdB that are separated by two furin cleavage sites. (B) SC-Ad6, which is E1 expressing (E1+), protein IIIa deleted ( $\Delta pIIIa$ ), and E3 deleted ( $\Delta E3$ ) expressing the TcdA/B fusion protein using the CMV promoter.

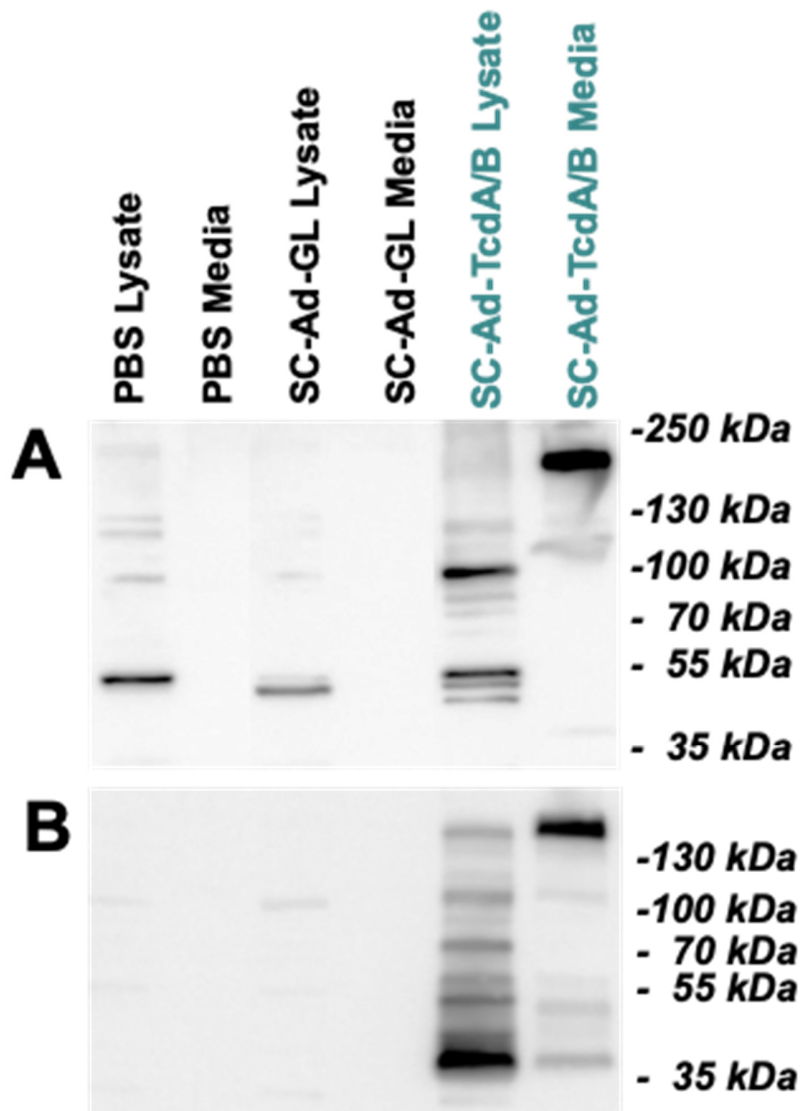

**Supplemental Figure S2. Single-cycle adenovirus expression of *C. difficile* TcdA/B fusion protein.** Western blot detecting expression of (A) TcdA and (B) TcdB fragments in the A549 cell lysates and media taken from uninfected cells, cells infected with an Ad control (SC-Ad6-GL), and cells infected with SC-Ad6-TcdA/B. The fusion protein (~MW 150 kDa), individual TcdA (~100 kDa) and TcdB (~50 kDa) fragments can be seen in SC-Ad6-TcdA/B infected cells. Non-specific binding to proteins the cells, and Ad control can be seen in both blots.

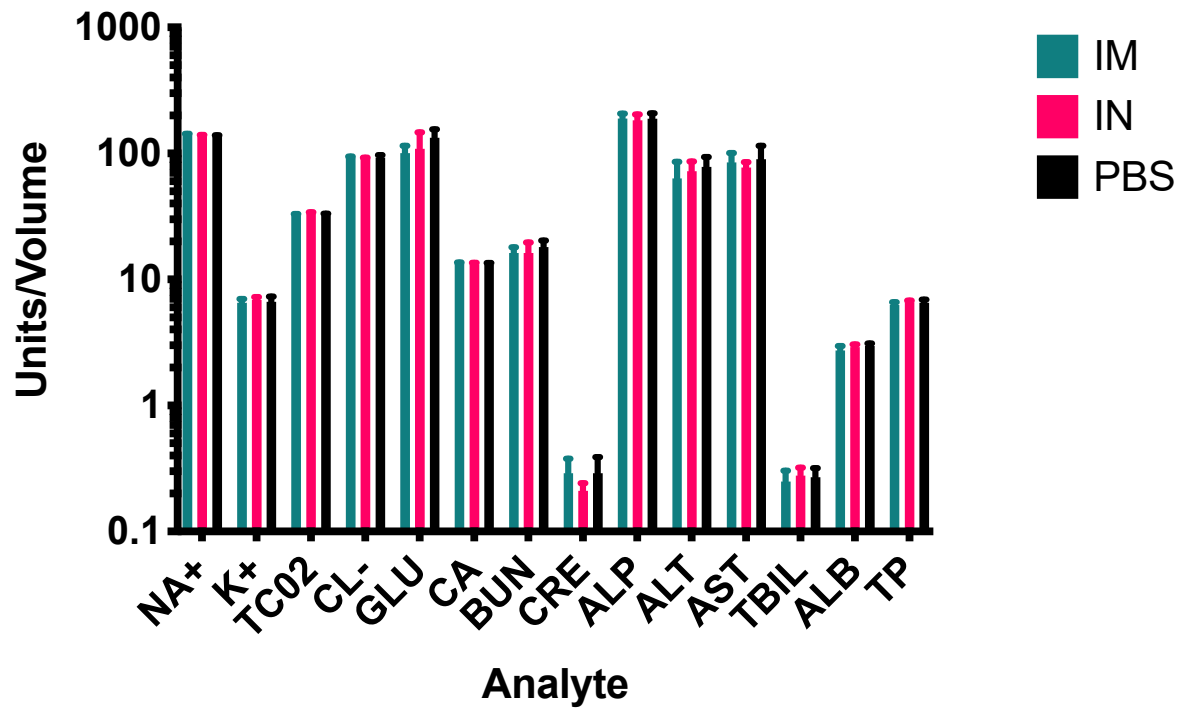

**Supplemental Figure S3. Blood chemistry of SC-Ad6-TcdA/B vaccinated animals.** Groups of 10 Syrian hamsters were immunized a single time with  $10^{11}$  virus particles of SC-Ad6-TcdA/B by the i.n. or i.m. route. Control animals received i.n. PBS. Blood was collected 3 days after immunization for clinical chemistry. Abbreviations shown in Table S1

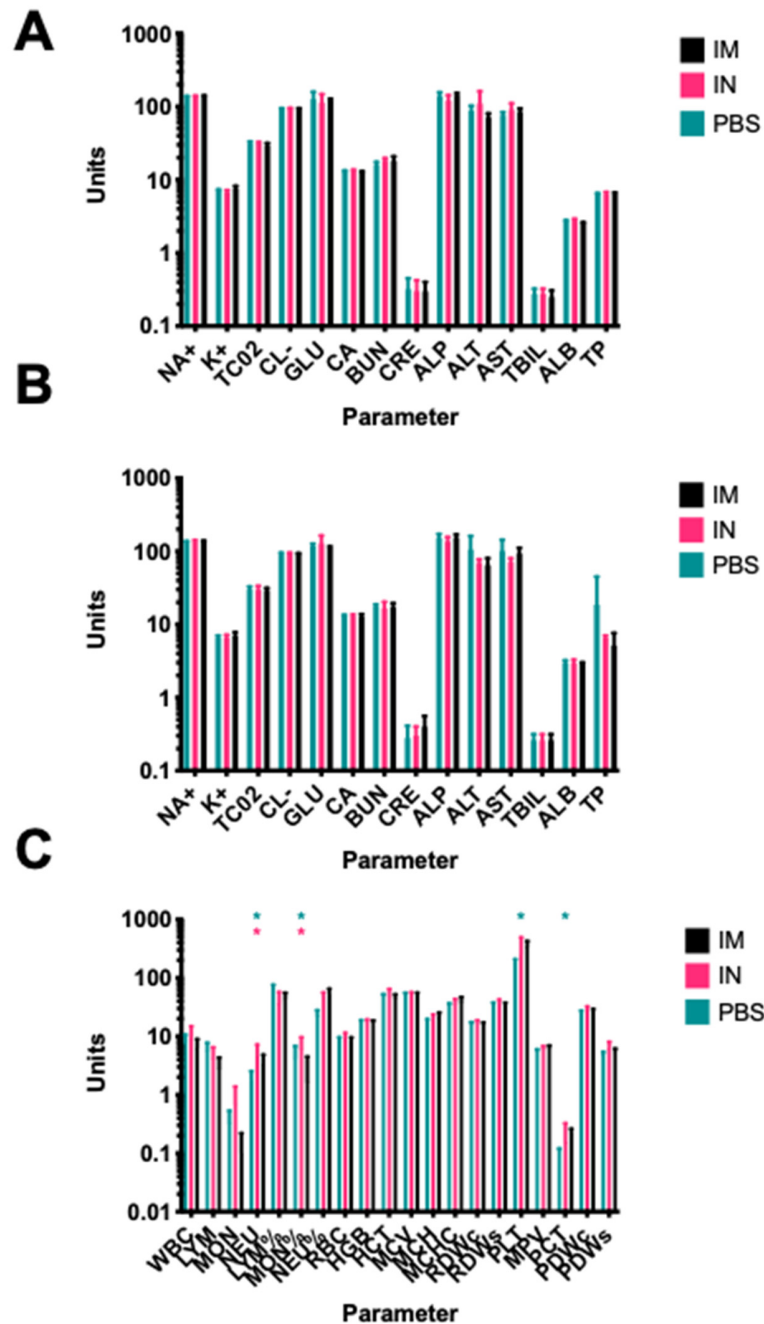

**Supplemental Figure S4. Blood chemistry and CBC of SC-Ad6-TcdA/B vaccinated animals.** Groups of 10 Syrian hamsters were immunized a single time with  $10^{11}$  virus particles of SC-Ad6-TcdA/B by the i.n. or i.m. route. Control animals received i.n. PBS. Blood was collected  $\frac{1}{2}$  of the cohort ( $n=5$  per group) **(A)** 3 and the other  $\frac{1}{2}$  of the cohort ( $n=5$  per group) **(B)** 4 days after immunization for clinical chemistry. **(C)** Blood was collected on day 4 from  $\frac{1}{2}$  of the hamsters ( $n=5$  per group) for CBC. Abbreviations for panel A and B in Table S1 and in Table S2 for panel C.

**Supplemental Table S1.** Veterinary Hematology (CBC) Assay on the Abaxis VetScan HM5 Analyzer Results Table.

| <b>Parameter</b>           | <b>Abbreviation</b> | <b>Units</b> |
|----------------------------|---------------------|--------------|
| Sodium                     | NA+                 | mmol/L       |
| Potassium                  | K+                  | mmol/L       |
| Total Carbon Dioxide       | tCO <sub>2</sub>    | mmol/L       |
| Chloride                   | CL-                 | mmol/L       |
| Glucose                    | GLU                 | mg/dL        |
| Calcium                    | CA                  | mg/dL        |
| Blood Urea Nitrogen        | BUN                 | mg/dL        |
| Creatinine                 | CRE                 | mg/dL        |
| Alkaline Phosphatase       | ALP                 | U/L          |
| Alanine Aminotransferase   | ALT                 | U/L          |
| Aspartate Aminotransferase | AST                 | U/L          |
| Total Bilirubin            | TBIL                | mg/dL        |
| Albumin                    | ALB                 | g/dL         |
| Total Protein              | TP                  | g/dL         |

**Supplemental Table S2.** Blood Chemistry Assay on the Piccolo Xpress Chemistry Analyzer Results Table.

| <b>Parameter</b>                                        | <b>Abbreviation</b> | <b>Units</b>       |
|---------------------------------------------------------|---------------------|--------------------|
| Total White Blood Cell count                            | WBC                 | 10 <sup>9</sup> L  |
| Lymphocyte count                                        | LYM                 | 10 <sup>9</sup> L  |
| Monocyte count                                          | MON                 | 10 <sup>9</sup> L  |
| Neutrophil count                                        | NEU                 | 10 <sup>9</sup> L  |
| Eosinophil count                                        | EOS                 | 10 <sup>9</sup> L  |
| Basophil count                                          | BAS                 | 10 <sup>9</sup> L  |
| Lymphocyte percentage                                   | LYM%                | %                  |
| Monocyte percentage                                     | MON%                | %                  |
| Neutrophil percentage                                   | NEU%                | %                  |
| Eosinophil percentage                                   | EOS%                | %                  |
| Basophil percentage                                     | BAS%                | %                  |
| Red Blood Cell count                                    | RBC                 | 10 <sup>12</sup> L |
| Hemoglobin                                              | HGB                 | g/dL               |
| Hematocrit percentage                                   | HCT                 | %                  |
| Mean Corpuscular Volume                                 | MCV                 | fL                 |
| Mean Corpuscular Hemoglobin                             | MCH                 | pg                 |
| Mean Corpuscular Hemoglobin Concentration               | MCHC                | g/dl               |
| Red Cell Distribution Width, coefficient of variation % | RDWc                | %                  |
| Red Cell Distribution Width                             | RDWs                | fL                 |
| Platelet count                                          | PLT                 | 10 <sup>9</sup> L  |
| Mean Platelet Volume                                    | MPV                 | fL                 |
| Platelet crit %                                         | PCT                 | %                  |
| Platelet Distribution Width, coefficient of variation % | PDWc                | %                  |
| Platelet Distribution Width                             | PDWs                | fL                 |
